# Supplementary material for: Recurrent evolution of heat-responsiveness in Brassicaceae COPIA elements
Source: PubMed Central journal article supplement (PMC5059998; doi:10.1186/s13059-016-1072-3), 2016-10-11
Supplement: 13059_2016_1072_MOESM5_ESM.pdf [file 13059_2016_1072_MOESM5_ESM.pdf]

Supplemental Data – Additional file 5

Pietzenuk *et al.*, Recurrent evolution of heat-responsiveness in *Brassicaceae* COPIA elements.

**Figure S1.** Number of transposable element families in *A. thaliana* (n = 364) and *A. lyrata* (n = 376) as identified by RepeatMasker. The overlap shows number of families common to both species and not overlapping parts the numbers of species-specific families.

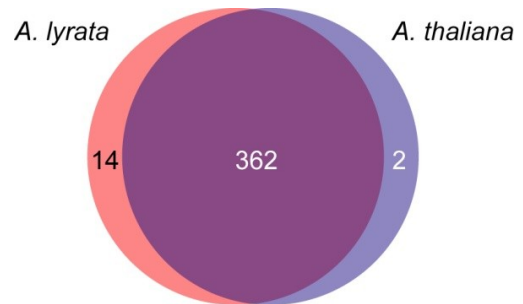

**Figure S2.** Unrooted phylogenetic tree of heat-responsive and -non-responsive COPIA TEs. The tree is based on the reverse transcriptase amino acid sequences (Additional file 10) of the following heat-responsive (ONSEN, TERESTRA, COPIA37 and ROMANIAT5) and -non-responsive (COPIA19, COPIA23, COPIA35, COPIA45, COPIA66, COPIA75) COPIA TEs.

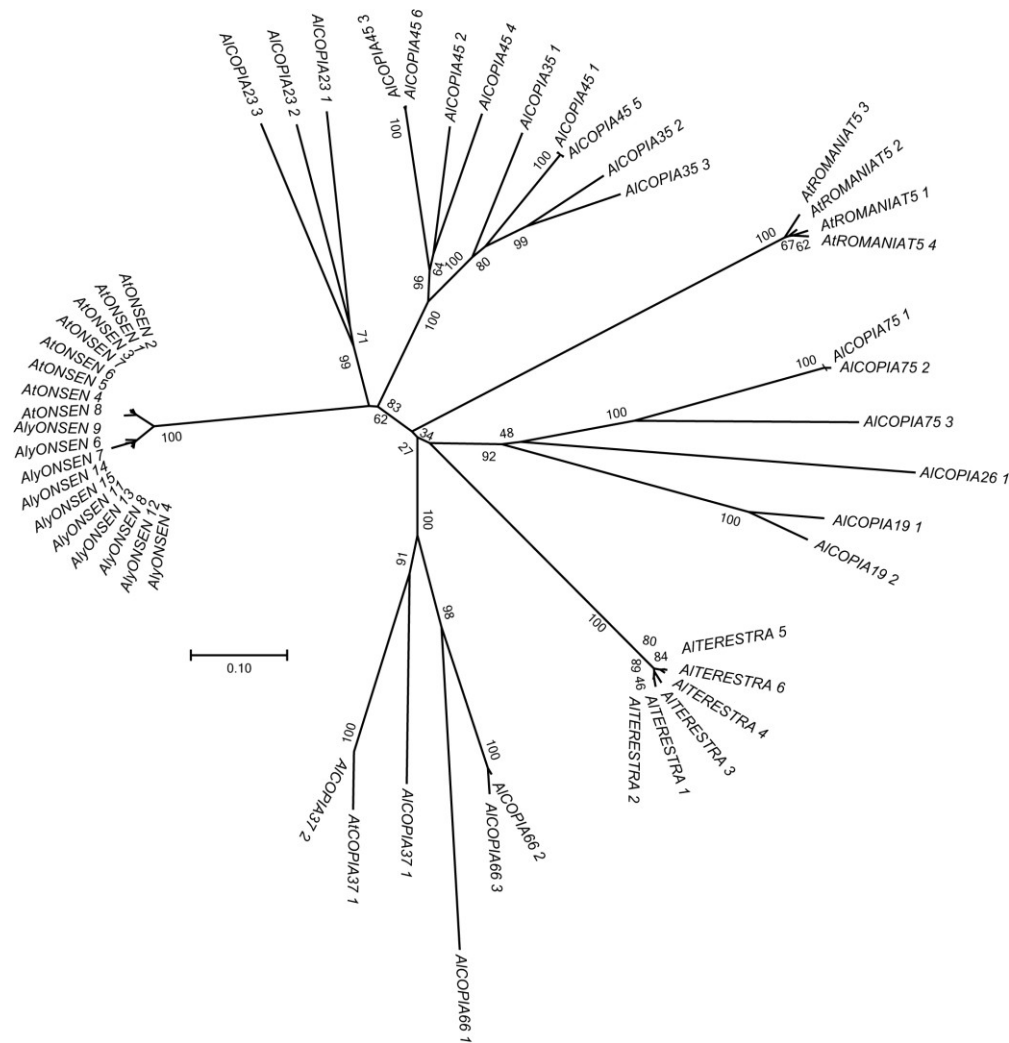

**Table S1.** List of *ONSEN* elements in *A. thaliana* Col-0 genome. \*Heat responsiveness is based on the RNA-sequencing data of this study. \*\*Names of *ONSEN1* to *ONSEN8* are based on Cavrak et al., 2014; HRE - Heat responsive element. RT - reverse transcriptase. \*\*\*Additional sequence insertion between 5' LTR and gag polyprotein domain.

|                      | Element**        | AGI code   | Chr      | Start    | End      | Size        | Type                                  | HRE  |
|----------------------|------------------|------------|----------|----------|----------|-------------|---------------------------------------|------|
| Heat responsive*     | <i>AtONSEN1</i>  | AT1TE12295 | 1        | 3780765  | 3785720  | 4956        | full-length                           | 4P   |
|                      | <i>AtONSEN2</i>  | AT3TE92525 | 3        | 22695566 | 22700521 | 4956        | full-length                           | 4P   |
|                      | <i>AtONSEN3</i>  | AT5TE15240 | 5        | 4208083  | 4213084  | 5002        | full-length                           | 4P   |
|                      | <i>AtONSEN4</i>  | AT1TE71045 | 1        | 21524995 | 21529850 | 4855        | full-length                           | 3P   |
|                      | <i>AtONSEN5</i>  | AT1TE59755 | 1        | 18013162 | 18018117 | 5273        | full-length                           | 4P   |
|                      | <i>AtONSEN6</i>  | AT3TE89830 | 3        | 22059535 | 22064329 | 4795        | full-length                           | 4P   |
|                      | <i>AtONSEN7</i>  | AT1TE24850 | 1        | 7714708  | 7715145  | 438         | full-length***                        | 4P   |
|                      |                  |            |          | 7717356  | 7722547  | 5191        |                                       |      |
| <i>AtONSEN8</i>      | AT3TE54550       | 3          | 13369174 | 13374107 | 4934     | full-length | 4P                                    |      |
| Heat-non responsive* |                  |            |          |          |          |             |                                       |      |
|                      |                  |            |          |          |          |             |                                       |      |
|                      | <i>AtONSEN9</i>  | AT1TE57015 | 1        | 17201388 | 17201573 | 185         | truncated solo LTR                    | none |
|                      |                  |            |          | 17201917 | 17202175 | 258         |                                       |      |
|                      |                  |            |          |          |          |             |                                       |      |
|                      | <i>AtONSEN10</i> | AT1TE10935 | 1        | 3360540  | 3361316  | 776         | pre-Integrase region                  | none |
|                      | <i>AtONSEN11</i> | AT2TE45420 | 2        | 10582288 | 10582517 | 229         | fragmented solo LTR                   | none |
|                      | <i>AtONSEN12</i> | AT2TE26505 | 2        | 6483643  | 6483961  | 318         | fragmented solo LTR                   | none |
|                      |                  |            |          |          |          |             |                                       |      |
|                      | <i>AtONSEN13</i> | AT2TE12265 | 2        | 2780086  | 2781859  | 1773        | fragment - RT & Rnase_H1              | none |
|                      | <i>AtONSEN14</i> | AT2TE62740 | 2        | 14190558 | 14191027 | 469         | RT fragment                           | none |
|                      | <i>AtONSEN15</i> | AT3TE59075 | 3        | 14401313 | 14403971 | 2658        | RT & Rnase_H1+3'LTR                   | none |
|                      | <i>AtONSEN16</i> | AT3TE59080 | 3        | 14403653 | 14403946 | 293         | fragment of 5'LTR and gag-polyprotein | none |
|                      |                  |            |          |          |          |             |                                       |      |
|                      |                  |            |          |          |          |             |                                       |      |
|                      | <i>AtONSEN17</i> | AT3TE31680 | 3        | 7539914  | 7540288  | 274         | solo LTR                              | none |
|                      | <i>AtONSEN18</i> | AT4TE42010 | 4        | 9320200  | 9320565  | 265         | truncated solo LTR                    | none |



**Table S2.** List of *COPIA78/ONSEN* elements in *Arabidopsis lyrata* MN47 genome.

\*Heat responsiveness is based on RNA-sequencing data of this study. HRE - Heat responsive element; contig end - the element is at the edge of particular genome assembly contig; n.a. - not analyzed; \*\*Heat responsiveness based only on multiply mapping RNA-seq reads; \*\*\*Not heat responsive in RNA-sequencing, possibly due to small size. RT - reverse transcriptase.

|                      | Element          | Scaffold | Start    | End      | Size | Type                              | HRE      | Ito et al. (2013) |
|----------------------|------------------|----------|----------|----------|------|-----------------------------------|----------|-------------------|
| Heat responsive*     | <i>AIONSEN1</i>  | 1        | 11268872 | 11273881 | 5010 | full-length                       | gap/step | 5                 |
|                      | <i>AIONSEN2</i>  | 1        | 24919344 | 24919772 | 429  | solo LTR                          | gap      | n.a.              |
|                      | <i>AIONSEN3</i>  | 2        | 1120762  | 1121196  | 440  | solo LTR                          | none**   | n.a.              |
|                      | <i>AIONSEN4</i>  | 2        | 4268383  | 4273330  | 4978 | full-length                       | gap/step | 3                 |
|                      | <i>AIONSEN5</i>  | 2        | 12788861 | 12789817 | 956  | solo LTR                          | gap/step | n.a.              |
|                      | <i>AIONSEN6</i>  | 3        | 13033504 | 13038475 | 4972 | full-length                       | gap + 4P | 2                 |
|                      | <i>AIONSEN7</i>  | 3        | 14350695 | 14355704 | 5010 | full-length                       | gap + 4P | 1                 |
|                      | <i>AIONSEN8</i>  | 3        | 23055604 | 23059108 | 3504 | contig end                        | gap      | n.a.              |
|                      | <i>AIONSEN9</i>  | 4        | 16304811 | 16309766 | 4956 | full-length                       | gap + 4P | 10                |
|                      | <i>AIONSEN10</i> | 5        | 4327023  | 4327410  | 388  | solo LTR                          | 4P       | 17                |
|                      | <i>AIONSEN11</i> | 5        | 9883484  | 9888427  | 4944 | full-length                       | gap + 4P | 7                 |
|                      | <i>AIONSEN12</i> | 6        | 22653438 | 22658398 | 4961 | full-length                       | gap      | 4                 |
|                      | <i>AIONSEN13</i> | 7        | 23781774 | 23786710 | 4937 | full-length                       | gap      | 7                 |
|                      | <i>AIONSEN14</i> | 8        | 15966326 | 15970217 | 3892 | full-length                       | gap + 4P | n.a.              |
|                      | <i>AIONSEN15</i> | 247      | 3711     | 8654     | 4944 | full-length                       | gap + 4P | 8                 |
|                      | <i>AIONSEN16</i> | 1007     | 2411     | 3818     | 1408 | contig end                        | none**   | n.a.              |
|                      | <i>AIONSEN17</i> | 638      | 3577     | 4818     | 1242 | contig end                        | gap + 4P | 12                |
|                      | <i>AIONSEN18</i> | 7        | 8283764  | 8284127  | 363  | fragmented solo LTR               | none     | n.a.              |
|                      | <i>AIONSEN19</i> | 1007     | 42       | 1686     | 1645 | RT                                | none     | n.a.              |
| Heat-non responsive* | <i>AIONSEN20</i> | 3        | 14003080 | 14004319 | 1239 | truncated 5'LTR & gag-polypeptide | none     | n.a.              |
|                      | <i>AIONSEN21</i> | 3        | 14016614 | 14019627 | 3013 | RT & RNase H1 & 3'LTR             | none     | n.a.              |
|                      | <i>AIONSEN22</i> | 1        | 10332397 | 10332510 | 113  | 3'LTR fragment                    | none     | n.a.              |
|                      | <i>AIONSEN23</i> | 1        | 13615947 | 13616317 | 370  | fragmented solo LTR               | none     | n.a.              |
|                      | <i>AIONSEN24</i> | 1        | 24919900 | 24920073 | 173  | solo LTR fragment                 | none     | n.a.              |
|                      | <i>AIONSEN25</i> | 1        | 25691749 | 25692168 | 419  | RT fragment                       | none     | n.a.              |
|                      | <i>AIONSEN26</i> | 1        | 25692678 | 25692869 | 191  | RNase H1 fragment                 | none     | n.a.              |
|                      | <i>AIONSEN27</i> | 2        | 11661689 | 11661997 | 308  | solo LTR fragment                 | none     | n.a.              |
|                      | <i>AIONSEN28</i> | 2        | 10259067 | 10259437 | 370  | fragment                          | none     | n.a.              |
|                      | <i>AIONSEN29</i> | 2        | 10974958 | 10975001 | 43   | LTR fragment                      | none     | n.a.              |
|                      | <i>AIONSEN30</i> | 2        | 11911062 | 11911137 | 75   | LTR fragment                      | none     | n.a.              |
|                      | <i>AIONSEN31</i> | 3        | 9491471  | 9491721  | 250  | fragment                          | none     | n.a.              |
|                      | <i>AIONSEN32</i> | 3        | 14002611 | 14002810 | 199  | truncated solo LTR                | 4P***    | n.a.              |

|                  |   |          |          |     |                                |      |      |
|------------------|---|----------|----------|-----|--------------------------------|------|------|
| <i>AIONSEN33</i> | 3 | 23040531 | 23040611 | 80  | solo LTR fragment              | none | n.a. |
| <i>AIONSEN34</i> | 4 | 15133412 | 15133767 | 355 | solo LTR fragment              | none | n.a. |
| <i>AIONSEN35</i> | 4 | 15138010 | 15138365 | 355 | solo LTR fragment              | none | n.a. |
| <i>AIONSEN36</i> | 5 | 18806876 | 18807231 | 355 | solo LTR & fragments           | none | n.a. |
| <i>AIONSEN37</i> | 5 | 9649982  | 9650265  | 283 | solo LTR fragment              | none | n.a. |
| <i>AIONSEN38</i> | 5 | 9943036  | 9943399  | 363 | solo LTR fragment              | none | n.a. |
| <i>AIONSEN39</i> | 5 | 11358443 | 11358638 | 195 | solo LTR fragment              | none | n.a. |
| <i>AIONSEN40</i> | 5 | 12394243 | 12394562 | 319 | fragment                       | none | n.a. |
| <i>AIONSEN41</i> | 5 | 12398029 | 12398350 | 321 | fragment                       | none | n.a. |
| <i>AIONSEN42</i> | 5 | 12560877 | 12561493 | 616 | gag-polypeptide                | none | n.a. |
| <i>AIONSEN43</i> | 5 | 13036269 | 13036319 | 50  | solo LTR fragment              | none | n.a. |
| <i>AIONSEN44</i> | 5 | 18802278 | 18802633 | 355 | fragmented solo LTR            | none | n.a. |
| <i>AIONSEN45</i> | 7 | 3003523  | 3003877  | 354 | fragmented solo LTR            | none | n.a. |
| <i>AIONSEN46</i> | 7 | 8288370  | 8288733  | 363 | fragmented solo LTR            | none | n.a. |
| <i>AIONSEN47</i> | 7 | 14850284 | 14850721 | 437 | solo LTR                       | none | 16   |
| <i>AIONSEN48</i> | 7 | 10045372 | 10046134 | 762 | fragmented solo LTR            | none | n.a. |
| <i>AIONSEN49</i> | 7 | 13857185 | 13857510 | 325 | Integrase core domain fragment | none | n.a. |
| <i>AIONSEN50</i> | 7 | 20135759 | 20135891 | 132 | RT fragment                    | none | n.a. |
| <i>AIONSEN51</i> | 7 | 23674987 | 23675327 | 340 | truncated solo LTR             | none | n.a. |
| <i>AIONSEN52</i> | 8 | 6163632  | 6163987  | 355 | fragmented solo LTR            | none | n.a. |
| <i>AIONSEN53</i> | 8 | 6159031  | 6159386  | 355 | fragmented solo LTR            | none | n.a. |
| <i>AIONSEN54</i> | 8 | 15685300 | 15685663 | 363 | fragment                       | none | n.a. |
| <i>AIONSEN55</i> | 8 | 17245916 | 17246222 | 306 | fragment                       | none | n.a. |

**Figure S4.** Percentage identity matrix of reverse transcriptase nucleotide sequences of *ONSEN* elements from different species. LTR identity: Pink = >80%. All elements for which the full reverse transcriptase sequence was available are shown. None of the *B. antipoda* contigs contained *ONSEN* reverse transcriptase sequence and therefore it is not presented here.

|                  | <i>BrONSEN3</i> | <i>BsONSEN1</i> | <i>BsONSEN2</i> | <i>EsONSEN</i> | <i>AtONSEN8</i> | <i>AtONSEN7</i> | <i>AtONSEN5</i> | <i>AtONSEN3</i> | <i>AtONSEN6</i> | <i>AtONSEN4</i> | <i>AtONSEN1</i> | <i>AtONSEN2</i> | <i>AIONSEN7</i> | <i>AIONSEN9</i> | <i>AIONSEN6</i> | <i>AIONSEN14</i> | <i>AIONSEN4</i> | <i>AIONSEN11</i> | <i>AIONSEN15</i> | <i>AIONSEN12</i> | <i>AIONSEN8</i> | <i>AIONSEN13</i> |
|------------------|-----------------|-----------------|-----------------|----------------|-----------------|-----------------|-----------------|-----------------|-----------------|-----------------|-----------------|-----------------|-----------------|-----------------|-----------------|------------------|-----------------|------------------|------------------|------------------|-----------------|------------------|
| <i>BrONSEN3</i>  | 100.0           | 84.1            | 84.6            | 84.1           | 84.3            | 84.0            | 84.4            | 84.2            | 84.2            | 84.5            | 84.5            | 84.4            | 82.5            | 85.1            | 84.4            | 85.1             | 84.4            | 84.5             | 84.5             | 84.7             | 84.8            | 84.8             |
| <i>BsONSEN1</i>  | 84.1            | 100.0           | 95.1            | 85.5           | 86.6            | 86.7            | 86.9            | 86.9            | 87.0            | 87.0            | 86.7            | 86.6            | 84.2            | 86.6            | 87.0            | 87.1             | 86.5            | 86.6             | 86.6             | 86.9             | 87.0            | 87.0             |
| <i>BsONSEN2</i>  | 84.6            | 95.1            | 100.0           | 85.8           | 87.0            | 86.9            | 87.0            | 87.3            | 87.1            | 87.4            | 87.1            | 87.0            | 81.7            | 86.6            | 87.0            | 87.1             | 86.5            | 86.6             | 86.6             | 86.9             | 87.0            | 87.0             |
| <i>EsONSEN</i>   | 84.1            | 85.5            | 85.8            | 100.0          | 87.8            | 87.3            | 87.3            | 87.3            | 87.3            | 87.5            | 87.3            | 87.3            | 86.7            | 88.7            | 88.0            | 88.5             | 88.0            | 87.8             | 87.8             | 88.2             | 88.5            | 88.7             |
| <i>AtONSEN8</i>  | 84.3            | 86.6            | 87.0            | 87.8           | 100.0           | 97.8            | 98.0            | 98.1            | 98.1            | 98.4            | 98.1            | 98.0            | 90.8            | 93.7            | 93.6            | 94.1             | 93.6            | 93.7             | 93.7             | 93.7             | 93.9            | 94.1             |
| <i>AtONSEN7</i>  | 84.0            | 86.7            | 86.9            | 87.3           | 97.8            | 100.0           | 99.1            | 98.9            | 99.2            | 99.2            | 98.9            | 98.8            | 91.7            | 94.2            | 94.2            | 94.7             | 93.9            | 94.3             | 94.3             | 94.0             | 94.2            | 94.2             |
| <i>AtONSEN5</i>  | 84.4            | 86.9            | 87.0            | 87.3           | 98.0            | 99.1            | 100.0           | 99.1            | 99.3            | 99.3            | 99.1            | 98.9            | 90.8            | 94.4            | 94.3            | 94.9             | 94.0            | 94.4             | 94.4             | 94.2             | 94.3            | 94.3             |
| <i>AtONSEN3</i>  | 84.2            | 86.9            | 87.3            | 87.3           | 98.1            | 98.9            | 99.1            | 100.0           | 99.2            | 99.5            | 99.5            | 99.3            | 91.7            | 94.3            | 94.6            | 95.0             | 94.2            | 94.6             | 94.6             | 94.3             | 94.4            | 94.4             |
| <i>AtONSEN6</i>  | 84.2            | 87.0            | 87.1            | 87.3           | 98.1            | 99.2            | 99.3            | 99.2            | 100.0           | 99.5            | 99.5            | 99.3            | 91.7            | 94.3            | 94.4            | 95.0             | 94.2            | 94.6             | 94.6             | 94.3             | 94.4            | 94.4             |
| <i>AtONSEN4</i>  | 84.5            | 87.0            | 87.4            | 87.5           | 98.4            | 99.2            | 99.3            | 99.5            | 99.5            | 100.0           | 99.5            | 99.3            | 91.7            | 94.6            | 94.7            | 95.3             | 94.4            | 94.9             | 94.9             | 94.6             | 94.7            | 94.7             |
| <i>AtONSEN1</i>  | 84.5            | 86.7            | 87.1            | 87.3           | 98.1            | 98.9            | 99.1            | 99.5            | 99.5            | 99.5            | 100.0           | 99.9            | 91.7            | 94.3            | 94.4            | 95.0             | 94.2            | 94.6             | 94.6             | 94.3             | 94.4            | 94.4             |
| <i>AtONSEN2</i>  | 84.4            | 86.6            | 87.0            | 87.3           | 98.0            | 98.8            | 98.9            | 99.3            | 99.3            | 99.3            | 99.9            | 100.0           | 91.7            | 94.2            | 94.3            | 94.9             | 94.0            | 94.4             | 94.4             | 94.2             | 94.3            | 94.3             |
| <i>AIONSEN7</i>  | 82.5            | 84.2            | 81.7            | 86.7           | 90.8            | 91.7            | 90.8            | 91.7            | 91.7            | 91.7            | 91.7            | 91.7            | 100.0           | 95.8            | 97.5            | 97.5             | 96.7            | 97.5             | 97.5             | 96.7             | 96.7            | 96.7             |
| <i>AIONSEN9</i>  | 85.1            | 86.6            | 86.6            | 88.7           | 93.7            | 94.2            | 94.4            | 94.3            | 94.3            | 94.6            | 94.3            | 94.2            | 95.8            | 100.0           | 97.2            | 97.7             | 98.0            | 98.1             | 98.1             | 98.1             | 98.0            | 98.0             |
| <i>AIONSEN6</i>  | 84.4            | 87.0            | 87.0            | 88.0           | 93.6            | 94.2            | 94.3            | 94.6            | 94.4            | 94.7            | 94.4            | 94.3            | 97.5            | 97.2            | 100.0           | 99.2             | 98.4            | 98.5             | 98.5             | 98.2             | 98.4            | 98.4             |
| <i>AIONSEN14</i> | 85.1            | 87.1            | 87.1            | 88.5           | 94.1            | 94.7            | 94.9            | 95.0            | 95.0            | 95.3            | 95.0            | 94.9            | 97.5            | 97.7            | 99.2            | 100.0            | 98.6            | 99.1             | 99.1             | 98.8             | 98.9            | 98.9             |
| <i>AIONSEN4</i>  | 84.4            | 86.5            | 86.5            | 88.0           | 93.6            | 93.9            | 94.0            | 94.2            | 94.2            | 94.4            | 94.2            | 94.0            | 96.7            | 98.0            | 98.4            | 98.6             | 100.0           | 99.1             | 99.1             | 99.1             | 98.9            | 98.9             |
| <i>AIONSEN11</i> | 84.5            | 86.6            | 86.6            | 87.8           | 93.7            | 94.3            | 94.4            | 94.6            | 94.6            | 94.9            | 94.6            | 94.4            | 97.5            | 98.1            | 98.5            | 99.1             | 99.1            | 100.0            | 100.0            | 99.2             | 99.1            | 99.1             |
| <i>AIONSEN15</i> | 84.5            | 86.6            | 86.6            | 87.8           | 93.7            | 94.3            | 94.4            | 94.6            | 94.6            | 94.9            | 94.6            | 94.4            | 97.5            | 98.1            | 98.5            | 99.1             | 99.1            | 100.0            | 100.0            | 99.2             | 99.1            | 99.1             |
| <i>AIONSEN12</i> | 84.7            | 86.9            | 86.9            | 88.2           | 93.7            | 94.0            | 94.2            | 94.3            | 94.3            | 94.6            | 94.3            | 94.2            | 96.7            | 98.1            | 98.2            | 98.8             | 99.1            | 99.2             | 99.2             | 100.0            | 99.1            | 99.1             |
| <i>AIONSEN8</i>  | 84.8            | 87.0            | 87.0            | 88.5           | 93.9            | 94.2            | 94.3            | 94.4            | 94.4            | 94.7            | 94.4            | 94.3            | 96.7            | 98.0            | 98.4            | 98.9             | 98.9            | 99.1             | 99.1             | 99.1             | 100.0           | 99.7             |
| <i>AIONSEN13</i> | 84.8            | 87.0            | 87.0            | 88.7           | 94.1            | 94.2            | 94.3            | 94.4            | 94.4            | 94.7            | 94.4            | 94.3            | 96.7            | 98.0            | 98.4            | 98.9             | 98.9            | 99.1             | 99.1             | 99.1             | 99.7            | 100.0            |



**Figure S5.** Percentage identity matrix of LTR nucleotide sequences of *ONSEN* elements from different species. LTR identity: Pink = >80%, yellow = 70-80%, green = 60-70%, no color = <60%. LTRs were clustered according to their similarity.

|           | BrONSEN2 | BsONSEN1 | BsONSEN2 | EsONSEN | AiONSEN2 | BaONSEN1 | BaONSEN2 | BaONSEN3 | AtONSEN4 | AtONSEN8 | AtONSEN7 | AtONSEN6 | AtONSEN5 | AtONSEN2 | AtONSEN1 | AtONSEN3 | AiONSEN10 | AiONSEN14 | AiONSEN6 | AiONSEN7 | AiONSEN9 | AiONSEN11 | AiONSEN15 | AiONSEN8 | AiONSEN13 | AiONSEN3 | AiONSEN16 | AiONSEN17 | AiONSEN4 | AiONSEN5 | AiONSEN1 | AiONSEN12 | BrONSEN3 | BrONSEN1 | BrONSEN4 | BrONSEN5 | BrONSEN6 |      |
|-----------|----------|----------|----------|---------|----------|----------|----------|----------|----------|----------|----------|----------|----------|----------|----------|----------|-----------|-----------|----------|----------|----------|-----------|-----------|----------|-----------|----------|-----------|-----------|----------|----------|----------|-----------|----------|----------|----------|----------|----------|------|
| BrONSEN2  | 100.0    | 60.8     | 64.3     | 64.9    | 60.1     | 64.1     | 61.5     | 61.4     | 63.5     | 62.4     | 62.3     | 62.4     | 62.4     | 62.4     | 62.4     | 62.0     | 64.5      | 64.7      | 64.7     | 62.4     | 63.5     | 64.1      | 63.5      | 64.1     | 64.7      | 65.9     | 67.5      | 67.5      | 64.7     | 64.7     | 65.9     | 65.9      | 63.6     | 61.5     | 64.1     | 59.6     | 62.3     |      |
| BsONSEN1  | 60.8     | 100.0    | 84.1     | 57.3    | 59.9     | 67.5     | 63.7     | 63.8     | 68.0     | 66.4     | 67.1     | 68.3     | 66.9     | 67.5     | 67.5     | 67.5     | 68.0      | 69.4      | 67.7     | 69.0     | 69.0     | 68.4      | 68.4      | 68.3     | 68.6      | 68.1     | 65.7      | 65.7      | 67.4     | 67.4     | 67.6     | 68.1      | 63.3     | 65.1     | 75.7     | 66.9     | 67.7     |      |
| BsONSEN2  | 64.3     | 84.1     | 100.0    | 61.5    | 64.6     | 72.7     | 70.0     | 70.1     | 74.5     | 72.7     | 73.3     | 73.9     | 73.0     | 73.6     | 73.6     | 73.6     | 73.9      | 74.1      | 75.7     | 76.0     | 75.7     | 76.0      | 75.7      | 75.1     | 75.1      | 75.7     | 73.0      | 73.0      | 74.5     | 74.5     | 73.9     | 73.6      | 71.6     | 69.9     | 76.6     | 73.9     | 70.6     |      |
| EsONSEN   | 64.9     | 57.3     | 61.5     | 100.0   | 66.8     | 73.7     | 72.1     | 69.9     | 72.4     | 72.7     | 72.4     | 73.3     | 73.0     | 73.0     | 73.0     | 73.1     | 73.3      | 72.9      | 73.2     | 74.0     | 74.7     | 74.3      | 73.7      | 73.5     | 74.1      | 73.6     | 72.5      | 72.5      | 75.2     | 75.2     | 73.7     | 73.7      | 69.7     | 67.5     | 78.6     | 67.3     | 69.3     |      |
| AiONSEN2  | 60.1     | 59.9     | 64.6     | 66.8    | 100.0    | 65.7     | 66.9     | 77.2     | 75.8     | 75.4     | 76.0     | 76.5     | 76.5     | 76.7     | 76.7     | 76.8     | 74.3      | 74.9      | 78.2     | 79.0     | 79.0     | 78.8      | 78.5      | 78.4     | 78.7      | 80.6     | 77.9      | 77.9      | 81.9     | 81.9     | 80.3     | 80.3      | 66.1     | 64.7     | 76.5     | 67.5     | 65.1     |      |
| BaONSEN1  | 64.1     | 67.5     | 72.7     | 73.7    | 65.7     | 100.0    | 79.2     | 82.8     | 76.5     | 76.5     | 76.8     | 76.5     | 76.2     | 76.8     | 76.8     | 76.5     | 75.9      | 77.0      | 78.0     | 78.6     | 78.6     | 79.3      | 78.6      | 77.1     | 77.8      | 78.5     | 78.4      | 78.4      | 77.5     | 77.5     | 77.0     | 77.0      | 71.8     | 74.3     | 85.4     | 72.4     | 74.8     |      |
| BaONSEN2  | 61.5     | 63.7     | 70.0     | 72.1    | 66.9     | 79.2     | 100.0    | 82.0     | 74.7     | 73.1     | 73.4     | 74.7     | 73.4     | 74.0     | 74.0     | 74.0     | 73.2      | 76.5      | 75.1     | 77.9     | 75.7     | 76.6      | 76.6      | 75.7     | 76.3      | 77.2     | 77.6      | 77.6      | 74.9     | 74.9     | 75.6     | 75.6      | 71.1     | 70.7     | 79.5     | 68.2     | 70.8     |      |
| BaONSEN3  | 61.4     | 63.8     | 70.1     | 69.9    | 77.2     | 82.8     | 82.0     | 100.0    | 78.7     | 77.2     | 79.4     | 79.4     | 78.7     | 79.4     | 79.4     | 79.4     | 78.3      | 80.0      | 81.8     | 81.8     | 81.0     | 82.5      | 81.8      | 81.3     | 81.3      | 81.0     | 81.9      | 81.9      | 78.8     | 78.8     | 79.6     | 78.8      | 69.0     | 73.9     | 82.2     | 72.2     | 75.9     |      |
| AtONSEN4  | 63.5     | 68.0     | 74.5     | 72.4    | 75.8     | 76.5     | 74.7     | 78.7     | 100.0    | 95.3     | 95.8     | 96.5     | 96.3     | 96.8     | 96.8     | 96.8     | 86.6      | 90.3      | 89.1     | 90.1     | 89.9     | 90.4      | 90.1      | 89.6     | 89.3      | 88.6     | 88.3      | 86.2      | 86.2     | 87.1     | 86.6     | 72.3      | 73.3     | 83.8     | 73.1     | 76.0     |          |      |
| AtONSEN8  | 62.4     | 66.4     | 72.7     | 72.7    | 75.4     | 76.5     | 73.1     | 77.2     | 95.3     | 100.0    | 97.7     | 98.0     | 98.2     | 98.2     | 98.2     | 98.2     | 88.6      | 92.9      | 91.1     | 92.3     | 91.8     | 92.7      | 92.5      | 92.1     | 91.8      | 89.0     | 90.0      | 88.8      | 88.8     | 89.5     | 89.1     | 71.0      | 71.1     | 83.8     | 73.1     | 75.7     |          |      |
| AtONSEN7  | 62.3     | 67.1     | 73.3     | 72.4    | 76.0     | 76.8     | 73.4     | 79.4     | 95.8     | 97.7     | 100.0    | 98.4     | 98.6     | 99.1     | 99.1     | 99.1     | 88.2      | 92.0      | 91.5     | 92.4     | 92.6     | 92.6      | 92.4      | 92.2     | 92.0      | 88.9     | 89.4      | 89.4      | 88.7     | 88.7     | 89.2     | 88.7      | 71.0     | 71.4     | 83.1     | 72.8     | 76.0     |      |
| AtONSEN6  | 62.4     | 68.3     | 73.9     | 73.3    | 76.5     | 76.5     | 74.7     | 79.4     | 96.5     | 98.0     | 98.4     | 100.0    | 98.9     | 99.3     | 99.3     | 99.3     | 92.6      | 91.3      | 92.7     | 92.5     | 92.9     | 92.7      | 92.5      | 92.9     | 92.5      | 92.3     | 89.2      | 89.7      | 88.8     | 88.8     | 89.5     | 89.1      | 71.0     | 71.4     | 83.1     | 73.4     | 76.0     |      |
| AtONSEN5  | 62.4     | 66.9     | 73.0     | 73.0    | 76.5     | 76.2     | 73.4     | 78.7     | 96.3     | 98.2     | 98.6     | 98.9     | 100.0    | 99.6     | 99.6     | 99.6     | 88.1      | 92.9      | 91.3     | 92.5     | 92.3     | 92.7      | 92.5      | 92.1     | 91.8      | 89.0     | 89.4      | 89.4      | 88.5     | 88.5     | 89.3     | 88.8      | 71.0     | 71.1     | 83.1     | 72.8     | 75.4     |      |
| AtONSEN2  | 62.4     | 67.5     | 73.6     | 73.0    | 76.7     | 76.8     | 74.0     | 79.4     | 96.8     | 98.2     | 99.1     | 99.3     | 99.6     | 100.0    | 100.0    | 100.0    | 88.6      | 92.6      | 91.8     | 92.9     | 92.7     | 93.2      | 92.9      | 92.5     | 92.3      | 89.4     | 90.0      | 90.0      | 89.0     | 89.0     | 89.8     | 89.3      | 71.3     | 71.6     | 83.8     | 73.4     | 76.0     |      |
| AtONSEN1  | 62.4     | 67.5     | 73.6     | 73.0    | 76.7     | 76.8     | 74.0     | 79.4     | 96.8     | 98.2     | 99.1     | 99.3     | 99.6     | 100.0    | 100.0    | 100.0    | 88.6      | 92.6      | 91.8     | 92.9     | 92.7     | 93.2      | 92.9      | 92.5     | 92.3      | 89.4     | 90.0      | 90.0      | 89.0     | 89.0     | 89.8     | 89.3      | 71.3     | 71.6     | 83.8     | 73.4     | 76.0     |      |
| AtONSEN3  | 62.0     | 67.5     | 73.6     | 73.1    | 76.8     | 76.5     | 74.0     | 79.4     | 96.8     | 98.2     | 99.1     | 99.3     | 99.6     | 100.0    | 100.0    | 100.0    | 88.6      | 92.6      | 91.8     | 92.9     | 92.7     | 93.2      | 92.9      | 92.5     | 92.3      | 89.4     | 90.0      | 90.0      | 89.0     | 89.0     | 89.8     | 89.3      | 71.3     | 71.6     | 83.8     | 73.4     | 76.0     |      |
| AiONSEN10 | 64.5     | 68.0     | 73.9     | 73.3    | 74.3     | 75.9     | 73.2     | 78.3     | 86.6     | 88.6     | 88.2     | 88.1     | 88.1     | 88.6     | 88.6     | 88.6     | 100.0     | 91.8      | 93.3     | 92.3     | 92.8     | 93.0      | 92.3      | 93.1     | 93.1      | 90.1     | 90.0      | 90.0      | 90.0     | 90.0     | 89.9     | 89.9      | 72.4     | 74.3     | 85.5     | 73.1     | 74.2     |      |
| AiONSEN14 | 64.7     | 69.4     | 74.1     | 72.9    | 74.9     | 77.0     | 76.5     | 80.0     | 90.3     | 92.9     | 92.0     | 92.6     | 92.9     | 92.6     | 92.6     | 92.6     | 91.8      | 100.0     | 94.9     | 96.4     | 96.5     | 97.5      | 97.0      | 96.3     | 96.1      | 91.0     | 92.5      | 92.5      | 92.2     | 92.9     | 92.4     | 73.8      | 74.6     | 85.6     | 75.4     | 77.4     |          |      |
| AiONSEN6  | 64.7     | 67.7     | 75.7     | 73.2    | 78.2     | 78.0     | 75.1     | 81.8     | 89.1     | 91.1     | 91.5     | 91.3     | 91.3     | 91.8     | 91.8     | 91.8     | 93.3      | 94.9      | 100.0    | 96.2     | 96.4     | 97.3      | 96.6      | 97.7     | 97.5      | 90.9     | 91.8      | 91.8      | 93.6     | 93.6     | 93.0     | 92.7      | 72.4     | 72.7     | 85.6     | 73.6     | 75.2     |      |
| AiONSEN7  | 62.4     | 69.0     | 76.0     | 74.0    | 79.0     | 78.6     | 77.9     | 81.8     | 90.1     | 92.3     | 92.4     | 92.7     | 92.5     | 92.9     | 92.9     | 92.9     | 92.3      | 96.4      | 96.2     | 100.0    | 97.7     | 98.2      | 98.0      | 97.2     | 97.0      | 91.5     | 92.6      | 92.6      | 92.9     | 92.9     | 92.7     | 92.5      | 72.8     | 73.5     | 84.4     | 75.0     | 77.0     |      |
| AiONSEN9  | 63.5     | 69.0     | 75.7     | 74.7    | 79.0     | 78.6     | 75.7     | 81.0     | 89.9     | 91.8     | 92.6     | 92.5     | 92.3     | 92.7     | 92.7     | 92.7     | 92.8      | 96.5      | 96.4     | 97.7     | 100.0    | 98.2      | 97.5      | 97.5     | 97.2      | 91.5     | 92.6      | 92.6      | 92.9     | 92.9     | 92.7     | 92.5      | 73.4     | 74.1     | 86.3     | 74.4     | 76.2     |      |
| AiONSEN11 | 64.1     | 68.4     | 76.0     | 74.3    | 78.8     | 79.3     | 76.6     | 82.5     | 90.4     | 92.7     | 92.6     | 92.9     | 92.7     | 93.2     | 93.2     | 93.2     | 93.0      | 97.5      | 97.3     | 98.2     | 98.2     | 100.0     | 99.3      | 98.6     | 98.4      | 92.5     | 93.7      | 93.7      | 94.1     | 94.1     | 94.1     | 93.9      | 74.0     | 74.4     | 85.6     | 75.3     | 77.3     |      |
| AiONSEN15 | 63.5     | 68.4     | 75.7     | 73.7    | 78.5     | 78.6     | 76.6     | 81.8     | 90.1     | 92.5     | 92.4     | 92.7     | 92.5     | 92.9     | 92.9     | 92.9     | 92.3      | 97.0      | 96.6     | 98.0     | 97.5     | 99.3      | 100.0     | 97.9     | 97.7      | 91.8     | 92.9      | 92.9      | 93.4     | 93.4     | 93.4     | 93.2      | 73.7     | 74.1     | 85.0     | 75.0     | 76.8     |      |
| AiONSEN8  | 64.1     | 68.3     | 75.1     | 73.5    | 78.4     | 77.1     | 75.7     | 81.3     | 89.6     | 92.1     | 92.2     | 92.5     | 92.1     | 92.5     | 92.5     | 92.5     | 91.3      | 96.3      | 97.7     | 97.2     | 97.5     | 98.6      | 97.9      | 100.0    | 99.3      | 91.6     | 92.7      | 92.7      | 94.2     | 94.2     | 92.8     | 92.6      | 73.4     | 73.8     | 85.6     | 75.0     | 76.0     |      |
| AiONSEN13 | 64.7     | 68.6     | 75.1     | 74.1    | 78.7     | 77.8     | 76.3     | 81.3     | 89.3     | 91.8     | 92.0     | 92.3     | 91.8     | 92.3     | 92.3     | 92.3     | 93.1      | 96.1      | 97.5     | 97.0     | 97.2     | 98.4      | 97.7      | 99.3     | 100.0     | 91.8     | 93.0      | 93.0      | 94.2     | 94.2     | 93.0     | 92.8      | 73.4     | 73.8     | 86.3     | 74.4     | 76.0     |      |
| AiONSEN3  | 65.9     | 68.1     | 75.7     | 73.6    | 80.6     | 78.5     | 77.2     | 81.0     | 88.6     | 89.0     | 88.9     | 89.2     | 89.0     | 89.4     | 89.4     | 89.4     | 90.1      | 91.0      | 90.9     | 91.5     | 91.5     | 92.5      | 91.8      | 91.6     | 91.8      | 100.0    | 98.2      | 98.2      | 93.8     | 93.8     | 93.8     | 94.6      | 94.3     | 72.5     | 72.1     | 84.4     | 72.9     | 74.0 |
| AiONSEN16 | 67.5     | 65.7     | 73.0     | 72.5    | 77.9     | 78.4     | 77.6     | 81.9     | 88.3     | 90.0     | 89.4     | 89.7     | 89.4     | 90.0     | 90.0     | 90.0     | 92.5      | 91.8      | 92.6     | 92.6     | 93.7     | 92.9      | 92.7      | 93.0     | 98.2      | 100.0    | 100.0     | 95.9      | 95.9     | 96.6     | 96.1     | 73.8      | 73.0     | 85.0     | 72.7     | 75.0     |          |      |
| AiONSEN17 | 67.5     | 65.7     | 73.0     | 72.5    | 77.9     | 78.4     | 77.6     | 81.9     | 88.3     | 90.0     | 89.4     | 89.7     | 89.4     | 90.0     | 90.0     | 90.0     | 92.5      | 91.8      | 92.6     | 92.6     | 93.7     | 92.9      | 92.7      | 93.0     | 98.2      | 100.0    | 100.0     | 95.9      | 95.9     | 96.6     | 96.1     | 73.8      | 73.0     | 85.0     | 72.7     | 75.0     |          |      |
| AiONSEN4  | 64.7     | 67.4     | 74.5     | 75.2    | 81.9     | 77.5     | 74.9     | 78.8     | 86.2     | 88.8     | 88.7     | 88.8     | 88.5     | 89.0     | 89.0     | 89.0     | 90.0      | 92.2      | 93.6     | 92.9     | 92.9     | 94.1      | 93.4      | 94.2     | 94.2      | 93.8     | 95.9      | 95.9      | 100.0    | 100.0    | 97.4     | 97.2      | 74.4     | 73.9     | 83.8     | 74.0     | 76.0     |      |
| AiONSEN5  | 64.7     | 67.4     | 74.5     | 75.2    | 81.9     | 77.5     | 74.9     | 78.8     | 86.2     | 88.8     | 88.7     | 88.8     | 88.5     | 89.0     | 89.0     | 89.0     | 90.0      | 92.2      | 93.6     | 92.9     | 92.9     | 94.1      | 93.4      | 94.2     | 94.2      | 93.8     | 95.9      | 95.9      | 100.0    | 100.0    | 97.4     | 97.2      | 74.4     | 73.9     | 83.8     | 74.0     | 76.0     |      |
| AiONSEN1  | 65.9     | 67.6     | 73.9     | 73.7    | 80.3     | 77.0     | 75.6     | 79.6     | 87.1     | 89.5     | 89.2     | 89.5     | 89.3     | 89.8     | 89.8     | 89.8     | 89.9      | 92.9      | 93.0     | 92.7     | 92.      |           |           |          |           |          |           |           |          |          |          |           |          |          |          |          |          |      |

**Figure S6.** Heat responsive elements (HREs) found in the 5' long terminal repeats of *COPIA37* elements. Only heat-responsive elements are shown for *A. lyrata* and *A. thaliana*. All elements are displayed for *C. rubella* and *E. salsugineum*. HRE types: orange – 3P, yellow – gap, green – step.

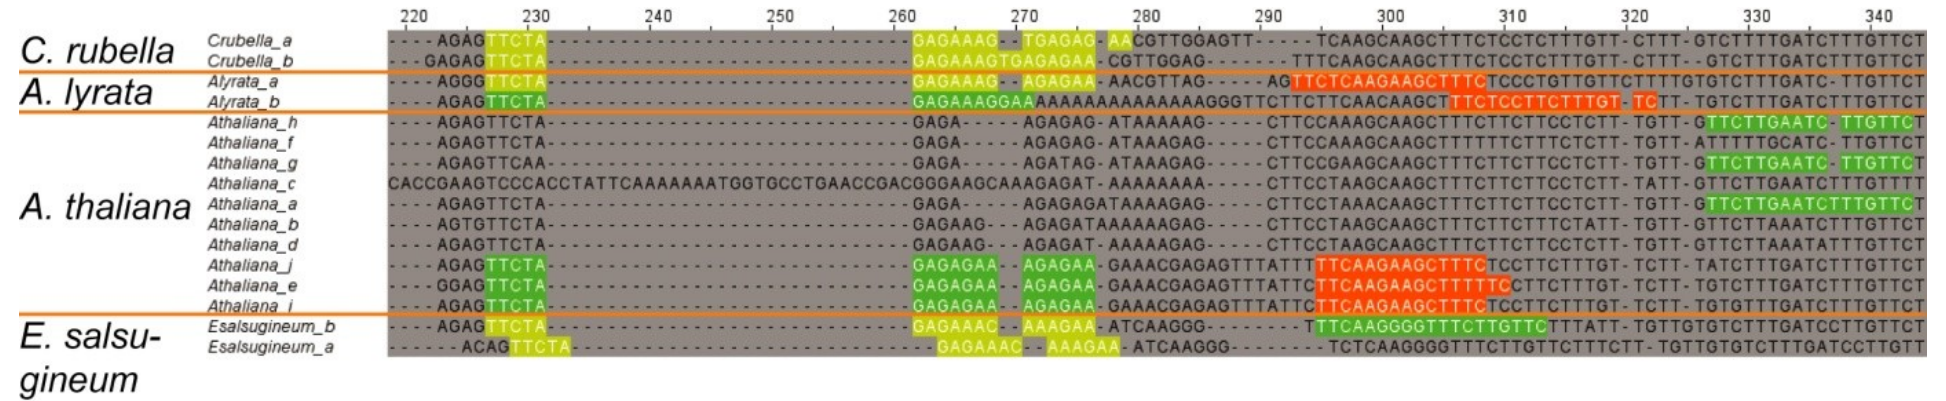



**Figure S7.** Consensus DNA sequence of *A. lyrata* *TERESTRAS*. Specific regions were indicated in different colors according to Fig. 3c: 5' LTR (grey), PBS (underlined), **GAG polyprotein** (green), **integrase** (violet), **reverse transcriptase** (yellow), **RNase H1** (blue), **PPT** (red), 3' LTR (grey). CG dinucleotides within 5' LTR were underlined and bold.

TGAAGTTAAACTTGATTTTGGTTTAAAGCTTAATTATGGGTTTATAATTCAATATTCTATATTGGATAAAACCCAAAGTTAAGCC  
 TAAGTTCTAGATTTCTCTAGAGCATCATAGAAAAATCATCACCTCCTTAAATGTTCTAGAGAATTTATTAGATAGATATTTAG  
 AWAATTATGTAGAATAATCTAGAAGTTTGAAGATAAAATCTAGATATTTTAGTAGAGTTATAGAGATGATGGTAGAATAATCT  
 AGAGACTTTGTAAGCTAACCTTGGAGGCTATAAATACCTCCTCACCCCMTCATTTGTAATWTGTGAGGAAGTTGAACAAG  
 TGAATAAAAAGAAAGTTCAAATAAAAGAACACTCTTTAAAAGTTCTAAGTCTCTCCAAAAGTCTTCAAGTAGTCTCTAATT  
 GTTCTTCCAAATTTCTATCATACTTAGAGGGTTTCTTATCTTGATTATATCGAGTTTCTCGGGTATTACGGTCTTGGGCTAGT  
 GCTAAGCACTATCGAGTTCGGTTTCTTACATGGTATCACTCGAGGACCCATTCTAATCTTGCTCTTCAAGATCGGGATT  
 ATAGGAAGACTCGGATCTACTAAGTATGGAATCTATGGGTCGTGTTGGATTGGGAATGGAGATCTAAACCAATCTA  
 ACTACCGGTATGGAAGTCATGATGGAGTCACTTGGTTAGTGAGGACTTATGGGATGTCGTGGCGGGAAGTAATACTT  
 CACCACCTACCGGAGATGCTGCAACCGCGGAAGCGACAAGGAGTGGACACGTAATAATGCCAAGGCGGARTTTRCTTTA  
 AAGAGGTCAATATCTCAGGAGTATTGAGCATGTCTCAAGGTGCACATCCGCTAGTTCATTTGGCAAGCGTTAGATCGAC  
 TGTTCAACAAGAAARAAAYGAAGCTCGTCTACAATTGTTAGAAAAAGAGTTGGCRAATGCGAAGCAGGGGAGTCTTCAAT  
 CGGAGTTTTCATCAAGGTAAGAACCTTTGCTCTGAGTMAATGATCTTAATCCGGAGGAATCAATCTCGGATGCTCGGT  
 GAAGCGGTTTATTATCGAGGTCTACGACCCGAGTATACACCGTTTGTGACTTCGGTTCAAGGATGGGCTACACAACCTTC  
 CTTGGARGAGTTTGAATAATTTGCTYGCCTCGCAAGAATCACTAGCRGTACAAATGGCCGGGAGTCAAAAATTCATGATGACTCG  
 GGRAGCGCYTTTGTAGCTAGGAGGCAACAMAACCTTYAAGCCAAATCYAATGAYGGTGGTCCAAGAAATATGATGGACAT  
 GAAGGATCTTTCAAGGGAGATAAGAAAAAATCAAGTGCATCCGGTGTGGAAAACCTWGGCATTTTAAAAARGATTGGCCGA  
 GTCAGCTGAAGGAAACAACATGGCRGAATCAAAGGTCAATGAAGACGAAGAAATGGGGAAAATGTTTTACGRTGGAG  
 GCTGCATCTTCAAGTACATCTACACCTAAGAARGTGGAAAATTAATTGGATCGTAGATTCTGGTTGTAGCCATCATATYACYG  
 GAGACGAGAAATATTTCTAGTCTTCAACGCCATGAAGGAAAAGCAATCATTACCGCGGATAATTCAATCCATCACGT  
 TGAGAAGGAAGGAACGGTGGTCTATCAAAAGGAGATGATGGAAGCCCAATCACTCTYRAGAACGTTTACCATGTTCTGGAGT  
 AAAAAAAGTCTTCTCCTCGTGGTAAATGCGGTGGACTCAGGTAATATGTYTTATTTGGCCCAAGAGATGTTAAATCTTAA  
 AGAATATTCAAGAGTTAAAGGCGGAYGTGGTTCACACTGGAGCACGRGTTAAAGATCTRTACGTTTTATCGGCGTCAAACCTC  
 TTATGTGGAGAAGTAGTACCAACGATAATGCTTTTATATGGCATGCTAGGCTTGGTCAAYATAAATGACTAARCTCAAG  
 GTTATGGTRAATAAGAYTTGGTCAACGGGCTCCCAAGTTGAAGATCCAAGATGAAGGCACACTTTGTGAAGGATGTCAT  
 ATGGAAGTCTCATAGACTTCCATTTGACTATTCCACTTCAAGGTGCAGTGTCCGTTGGARAGGGTCCAYAGTGACTTGT  
 GGGTCCGACAAGAACCCTCATATTYCGGGTATCRCTACATGTTGTTGTTGTTGTTGAYGACTTCTCWCGGTACACTTGGT  
 ATACTTGTGAAGGAAAAATCTGAAGTATTCTCCAAGTTCTAGAATTCAAGGTTACCGTGGAAAGGGGAGTTAGGTGAGAAG  
 ATCAAGACTTAAGCGGATAATGGAGGGGAGTTCATGTAAGGAGTTTCTCTTTTTGTAGATAATGGTATCAAGA  
 GAGAAATTTACATGTCCGCATACACCTCAACAAAATGGAGTAGCAGAGGAAAGATCAGACATCTAAGTGAAGACGTGAGAA  
 GTTGGCTCCATGGHAAAGATTTGCCTAAGGAGTTATGGGCGGAGGGMATGAGATGTGCAGCCTATGTCATCAACCGGATG  
 CCACTTAGTCCAAACAATATGAAGTCTCCTTATGAGATGGTTCATGGGAAGAAGCCAACGGTGAACATCTCAGAATATTTG  
 GATCAGTCTGCTACGTYCATGTGTTTATTACAAAAGTAAGTTGGAGGCAAGGCAAGAAATGCATATTTGTGCGGCTA  
 TGATGAACAAAGGAAGGTTGGAGGTGATGGATCCTGACACAGATATGTTGTGTCTCGTGTGTTGTTGTTGTTGTTGTTGAA  
 GTTCTTCTACTACGGGCCACCTCAAGTCTTGGTTGAAAAAGATGGTGCRAAGTCTTCCAAGATCGATGAATCAACTCTCC  
 AAGTACCATGTGAGARTGGAAGTCTTGGAAATAAATCAAGGTCAAGGGGGAGCACTAACCAAGAAGAGGAACAAG  
 ATCATGGTTCGATGGTCAATCAACGGCCGAAAAGAAACATTGCAAGCTGCAAGATATAGAGATGAAGAATCATCACTAC  
 TTATTGATCTTCTTCGAGTCCGTTAGATGATGATGAGCATCTTCTTATGATGAAGCTAAAGGATCCAAGAATGGGAA  
 GCTGCAATGAAGGAGGAGATGAGTGTCTMAAGAAAATGAAACTTGGGATCTGGTTCCAAAACCCAAAGGATGTTGAGCCC  
 GTTCTTGTCAAATGGGTGTATCGAATTAAGCGAAAAGCAGATGGGAGCATTGATAGRTTAAAGCAAGGTTGGTTGCTCGG  
 GGATCTCTCAAARTATGGAGAAGATTATGATGAGACATTYAGTCCWGTGGCGAAGATGACTACGGTACGCTCACTYTTAT  
 CTTAGCAGCAWGYTTTGGTGAAGTTATGGCAACTTGTGTAAGATGCTGAAAGATGCCTTTCTATATGGTGAAGTAAAGAT  
 CTTGATGGAGCAACACCTGTTTTGCAATCAGCAGAGCATCYTGATCATGTGTGCAAGCTGAAAAAGGCCTGTACGGATT  
 AAAACAAGCTCCACGAGCTTGGTATGGAAGGTTGCTCARTTCTTCAATTTTGGCGCTATGAGGCATCAAATCTGACCCG  
 AGTCTATTCTTCAAAGAAGAAAGGAGGAGTYCACGTAGTAGTTCTTCTTACGTGGATGATATGATAATTACYGGGAATGATG  
 ATGCAGAAATGCTCGCTTACAAGAAGAYATGTCGATAAGGTTGAGATGAAGAAGTTGGGTGAGCTGAATAACTTCTTGG  
 CCTAGAGGTTGAAAGAGKAAAKGATGGAATTTCTGTTGGCAACAAGTTATGCAAGAAGGATTGTTGAGAAGTTCCGGGT  
 GCACGAAGGAAAGAYGCGCACTACTCCGATGGATGTGAACATCAAGCTCAAACGTGATGAAGGTTTATTGTTACCTGATCC  
 TCGACCTTATCGYGTCTTGTGGGAAGTCTTCTATACTTAACCATACAAGACCTGATATTGCCCTCGCRGTAGGTCTKGTA  
 AGTCCGTTTATGCAAGCACCAAGGAAACACACTTAGAAGCGGCAAGAAGATCTTGAAGTATGTCGAAGACAACCTTGGAC  
 ATGGGCTTGGTGTACAAGTACAATGCAAAAGATTTCTCTCATGGTTTTACAGATGCTGACTTTGGTGGAGATCTAGATGACC  
 GAAAATCAACTTCGGGCTATGTGTTCTTATGTGGAGACACAAGCATTTCGTGGTGTAGCAAGAAACAACCAACGGTATCGCT  
 ATCTACCACTGAAGCGGAGTATAAAGCTTCCACACTCGCTGCTCAAGAGTGTATATGGCTTCGAAGACTCTTGAAGATTTG  
 TTCGAGCCATAAATAACCGGTGGCTATCTACGGAGATAATCAAAGTGTATCAAGTTAGCTAACAATCCGGTGTTCATG  
 CAAGGACAAARCATATTGAGTTAGAACATCACTTATAAGGGGAGAAGTTCTTCTTGTGGAACAATGAAGCCTTGGAAAGT  
 TCGAAGTGAGGACAACGTTGCAGACATCTTCAACCAAGTCATTACCAAAAGGCCAATTCGAGTTACTTCGCTYGAAGCTCGG  
 GATGGTTGACAAAATCAAGTTTAAAGGGGAGTATTGAAGTTAACTTGATTTGGTTAAGCTTAATTATGGGTTTATAATTC  
 AATATTCTATATTGGATAAAACCCAAAGTTAAGCCTAAGTTCTAGATTTCTAGAGCATCATAGAAAAATCATCACCTCCTTA  
 AATGTTCTAGAGAAATTTAGATAGATATTAGAWAATTAGTAATAATCTAGAATACTAGAAGTTTGAAGATAAATCTAGATAT  
 TTAGTAGAGTTATAGAGATGATGGTAGAATAATCTAGAGACTTTGTAAGCTAACCTTGGAGGCTATAAATACCTCCTCACCC  
 CCMTCAATTTGTAATWTGTGAGGAAGTTGAACAAGTGAATAAAAAGAAAGTTCAAATAAAAGAACACTCTTAAAAGTTCTCT  
 AAGTCTCTCCAAAAGTCTTCAAGTAGTCTAATTTGTTCTTCCAAATTTCTATCATACTTAGAGGRTTTCWTATCTTGATTA  
 TATCGAGTTTCTCGGATATTACGGTCTTGGGCTAGTGCTAAGCACTATCGADYTCGGDTTCTTAAACCAATCA

**Table S3.** List of *Arabidopsis thaliana* accessions negatively tested for presence of *TERESTRA* elements. *Arabidopsis lyrata* MN47 genomic DNA was used as positive control.

| Line   | Arabidopsis Biological Resource Centre ID | Line       | Arabidopsis Biological Resource Centre ID |
|--------|-------------------------------------------|------------|-------------------------------------------|
| Bay-0  | CS76094                                   | Se-0       | CS76226                                   |
| Bor-4  | CS76100                                   | Shahdara   | CS76227                                   |
| Bur-1  | CS76105                                   | Sq-8       | CS76230                                   |
| C24    | CS76106                                   | Uod-7      | CS76296                                   |
| Ct-1   | CS76114                                   | Van-0      | CS76297                                   |
| Oy-0   | CS76203                                   | Wei-0      | CS76301                                   |
| Kin-0  | CS76153                                   | Ws-0       | CS76303                                   |
| Kno-18 | CS76154                                   | Yo-0       | CS76305                                   |
| Ga-0   | CS76133                                   | Zdr-6      | CS76306                                   |
| Got7   | CS76136                                   | Hod        | CS76141                                   |
| Gy-0   | CS76139                                   | Kbs-Mac-8  | CS76151                                   |
| Hr-5   | CS76144                                   | Köln       | CS76155                                   |
| LL-0   | CS76172                                   | LAC-3      | CS76157                                   |
| Lp2-2  | CS76176                                   | LDV-58     | CS76163                                   |
| Lp2-6  | CS76177                                   | Liarum     | CS76166                                   |
| Lz-0   | CS76179                                   | Krot-2     | CS28420                                   |
| Mr-0   | CS76190                                   | Li-7       | CS28461                                   |
| Mt-0   | CS76192                                   | Mc-0       | CS28490                                   |
| Nd-1   | CS76197                                   | Mh-0       | CS28492                                   |
| Pna-17 | CS76213                                   | Nc-1       | CS28527                                   |
| Pro-0  | CS76214                                   | No-0       | CS28564                                   |
| Pu2-23 | CS76215                                   | Udul       | CS76269                                   |
| Ra-0   | CS76216                                   | UKID101    | CS76270                                   |
| Ren-1  | CS76218                                   | UKNW06-436 | CS76278                                   |
| Rsch-4 | CS76222                                   | UII2-3     | CS76293                                   |

**Figure S8.** The fragment of *TERESTRA* from *A. cebennensis* clone 44. This sequence was identified by BLASTs in NCBI sequence database using *A. lyrata TERESTRA* consensus sequence. Domains were indicated in different colors according to Figure 4A: 5' LTR (grey), PBS (underlined) and GAG polyprotein (green).

TGAATAACTGAACGGGTAACAGAATTATGGTTAAGCTTAATTATGGGTTTATAATTCAATATCCTATATTGA  
 ACAAACCCAAAGTTAAGCCAAAGTTCTAGATTTCTCTAGAGCATCATAGAAAAATCATCACCTCCTTAAGTGT  
 TCTAGAAAATTTTATTAATAGATATTTAGATAATTATGTAGAATAATCTAGAAGTTTGTAAAGATAAAATCTAGAT  
 ATTTTAGTAGAGTTATAGAGATGATTTTAGAATAATCTAGAGACTTTGTAAGCTAACTTTGGAGGCTATAAATA  
 CCTCCTCACCCCTCATTGTAATCAAGTTGAACAAGTGAATAAAAAAGAAAGTTCAAATAAAAGAACCCTCTAT  
 ATAAATTCTCTAAGTCTCTCTAAAAGTCTTTCAAGTAATCTCTAGTTGTTCTTCCAAATTTTCTATCATACTTAGA  
 GGATTTCTTATCTTGGTTATATCGAGTTTCTCGGGTATTACGGTCTTGGGCTAGTGCTAAGCACTATCGAGTC  
 GGTTTCTTACATGATATCAGAGCCATTCTAATCTTGTGCTCATCAAGATCAAGGTTATAGAGAACTCGGGTTT  
 ACTCTAAGTATGGAATCTATGGGTCGTGTTGTTGGATTGGGAATGGAGATC TTAAACCAATCTAACTACCGG  
TATGGAAGTCATGTATGGAGTCATACTTGGTTAGTGAGGACTTATGGGATGTCGTGCGCGGAAGTAGTACTT  
CACCACCTACCGGAGATGCTGCTACTGCGGAAGCGACAAAGGAGTGGACACGTAATAATGCCAAGGCGGAG  
TTTGCTTTAAAGAGGTCAATATCCTCGGGAGTATTGAGCATGTCTCAAGGTGTACATCCGCTAGTTCAATTT  
GGCAAGCTTTAGATCTACTGTTCAACAAGAAGAACGAAGCTCGTCTATAATTGTTAGAAAACGAGTTGGCGAA  
TGCGAAGCTGGGGGAGTCTCAATCTCGGAGTTTTTCATCAAAGTCAAGAACCTTTGCTCTGAGATCAATAGT  
CTTAATCCGGAGGAATCAATCTCGGATGCTCGGTTGAAGCGGTTTATTATTGAGGCTTAGACCCGAGTATA  
CACCGTTTGTGACTTCGGTTCAAGGATGGGCTACACAACCTTCCTTGGAAGAGTTTGAAAATTTGCTTGCTTC  
 GCAAGAATCACTAGCGGTACAAATGGCGGGAGTCAAAATTCATGATGACTCGGGGAGCGCTTTTGTAGCTAG  
 GAGGCAACACAACCTCAAAGCCAAATCCAATGATGGTGGTCCAAGAAAAATGATGGACATGAAGGATCTTC  
 TAAGGGAGATAAGAAAAAATCAAGTGCTATCGGTGTGAAAACCTTGGGCATTTTAAAAAAGATTGCCGAGTC  
 AAGCTGAAGGAAACAAAGATGGCAAAATCAAAGGTCATAATGAAGACGAAGATGGGGAAAATGTTTTATG  
 GTGGAGGCTGCATCTTCAAGTACATCTACACCTAAGAAGGTGGAAAATAATTGGATCGTAGATTCTGGTTGTA  
 GCCATCATATCACCGGAGACGAGGAATTTTTCTAGTCTTCAACGCCATGAAGGAAAAGAAGCAATCATTAC  
 CGCGAATAATTCAATCCATCACGTTGAGAAGGAAAGAACGGTGGTCATCAAAGGAGATGATGGAAGCCCAAT  
 CACTCTCGAGAACGTTTACCATGTTCTGAGTAAAAAAGAATCTTCTCTCCGTGGTAAATGCGGTGGAGTCA  
 GGTAATATGTTTTATTTGGCCCAAGAGATGTAAATTCTTAAAGAATATTCAAGAGTTAAAGGCGGACATGGT  
 TCACACTGGAGCACAGGTTAAAGATCTGTACGTTTTATCGGCGTTAAACTCTTATGTAGAGAAGAT

**Figure S9.** *A. halleri* TERESTRA reconstructed based on NCBI BLASTs using *A. lyrata* TERESTRA consensus sequence. Domains were indicated in different colors according to Figure 4A: 5' LTR (grey), PBS (underlined), GAG polyprotein (green), integrase (violet), reverse transcriptase (yellow), RNase H1 (blue), PPT (red), 3' LTR (grey). Note that LTRs could not be reconstructed to a full length.

```

GGTTTTCTTATCTTGGTTATATCGAGTTTCTCGGATATTACGGTCTTGGGCTAGTGCTAAGCACTATCGAGTC
GGTTTTCTTACATGGTATCAGAGCCATTCTAATCTTGTGCTCTTCAAGATCGGGTTATAGAGAACTCGGGTT
TACTCTAAGTATGGAATCTATGGGTCGTGTTGTTGGATTGGGAATGGAGATCTAAACCAATCTAACTACCGG
TTATGAAAGTCATGTATAGAGTCACTTGGTTAGTGAGGACTTATGGGATGTCGTCGGCGGAAGTAATACTT
CACCACCTACCGGAGATGCTGCAACCGCGGAAGCGACAAAGGAGTGGACACGTAAAAATGCCAAGGCGGA
GTTTGCTTTAAAGAGGTCAATATCTTCGGGAGTATTTGAGCATGCTCAAGGTGCACATCCGCTAGTTCTATT
TGGCAAGCGTTAGATCGACTGTTCAACAAGAAGAACGAAGCTCGTCTACAATTGTTAGAAAACCGAGTTGGCG
AATGCGAAGCAGGGGGAGTCTTCAATCTCAGAGTTTTTCATCAAGGTAAAAAACCTTTGCTCTGAGATCAATA
GTCTTAATCCGGAGGAATCAATCTCGGATGCTCGGTTGAAGCAGTTTATTATTCGAGGTCTACGACCCGAGT
ATACACCGTTTGTGACTTCGGTTCAAGGATGGGCTACACAACCTTCCCTGGAGGAGTTTGAAAATTTGCTTGC
TTCGCAAGAATCACTAGCGGTACAAATGGCGGGAGTCAAATTCATGATGACTCGGGGAGCGTTTTGTAGC
TAGGAGGCAACACAACCTTCAAAGCCAAATCTAATGATGGTGGTCCAAGAAATAATGATGGACATGAAGGATCT
CTAAGGGAGATAAGAAAAAATCAAGTGTATCGGTGAAAACCTGGGCATTTAAAAAGGATTTGCCGAG
TCAAGCTGAAGGAACAAACATGGCGGAATCAAAGGTCAAATGAAGACGAAGAATGAGGAAAATGTTTTTA
CGGTGGAGGCTGCATCTTCAAGTACATCTACACCTAAGAAAGTGGAAAATAATTGGATCGTAGATTCTGGTTG
TAGCCATCATATCACTGGAGACGAGAAATTTTTCTAGTCTTCAACGCCATGAAGGAAAAGAAGCAATCATT
ACCGCAGATAATTCAATCCATCACATTGAGAAGGAAGGAACGGTGGTCAATCAAGGAGATGATGGAAGCCCA
ATCACTCTCGAAAACGTTTACCATGTTCCCTGGAGTAAAAAGAATCTTCTCTCCGTGGTGAATGTGGTGGACT
CAGGTAACATGTTTTATTTGGCCCAAGGGATGTTAAATCTTAAAGAATATCCAAGAGTTAAAGGCGGACGC
GCTTCACACTGGAGCACGGGTTAAAGATTTATACGTTTTATCGGCGTCAAACCTTATGTGAAAAGATGAGT
ACCAACGATAATGTCTTTATATGGCATGCTAGGCTTAGTCACATAAATAAGACTAAACTCAAGGTTATGGTGAA
TAAAGATTTGGTGAACGGGCTCCCAAAGTTGAAGATCCAAGATGGAGGCACAATTTGTGAAGGATGTCAATA
TGAAAATCTCATAGGCTTCCATTTGACTATTCCATTTCAAGGTGCAGTTTTCCGTTGGAGAGGGTCCACAGT
GACTTGATGGGTCCGACAAGAACCCTCATATTCGGGTATCTCTACATGTTGTTGTTGCTGACGACTTCT
CTCGGTACACTTGGGTATACCTTGTGAAGGAAAAATCTGAAGTATTCTCCAAGTTTCTAGAATCAAGGTTACC
GTGGAAGGGGAGTTAGGTCAGAAGATCAAGACTTTAAGGACGGATAATGGAGGGGAGTTTCATGTCTAAGGA
GTTTCTCTCTTTTTGTCGAGATAATGGTATCAAGAGAGAATTTACATGTCCGCATACACCTCAACAAAATGGAG
TAGCAGAGAGGAAGATCAGACATCTAAGTGAGAGCTGAGAGCTGATAAGTTGGCTCCATGGAAAAGATTTGCCAAGG
CGTTATGGGCGGAAGGCATGAGATGTGCAGCTTATGTACATCAACCGGATGCCACTTAGTCCAAACAATATGA
AGTCTCCTTATGAGATGGTTCATGGGAAGAAGCCAACGGTGAACATCTCAGGATATTTGGATCAGTCTGCTT
CGTCCATGTGTTTGATTACAAAAGAACCAAGTTGGAGGCAAAGGCGAAAAAATGCATATTTGTCGGCTACGAT
GAACAAAGGAAGGGTTGGAGGTGTATGGATTCCGAGACACACAAGTATGTTGTGCTCGTGATGTTGTCTTT
GATGAAGTTTCTTCACTACGGGTCACCTCAAGTCTTGGTTGAGAAAGATGGTGCTAATTCCTTAAGAACG
ATGAATCAACTCTCAAGTACCATGTGAGATGGGAAGTCCGAAAATAAATCAAGGTGAAAAGGGGAGCA
CTAACCAAGAAGAAGAAGAGGAACAAGATCATGGTTCGATCAATCAACGGTCAAGGAAAGAAACATTGTCA
AGCCTGCAAGATATAGAGATGAAGTATTCATCACTACTTATTCTGCTTCTTACAGCTCCTCTAGATGATGAT
GAGCCATCTTCTTATGATGAAGCTAAAGGAGTTCAAGAATGGGAAGTTGCAATGAAGGAGGAGATGAGTGCT
CTCAAGAAAATGAAAACCTGGCATCTGGTTCCAAAACCCAAGGATGTTGAGCCCGTTTTCTTGCAAAATGGGTGT
ATCGAATTAAGCAAAAAGCGGATGAGAGCATTGATAGGTTTAAAGCAAGGTTGGTTGCTCGGGGATTCTCTC
AAAAATATGGAGAAGATTATGATGAGACATTTAGTCTGTGGCGAAGATGACAACCTTGATGTGAAGAAATGCTT
TTCTATATGGTGAGCTTGATAAAAGTATCTTCATGGAGCAACCCTGGTTTCGAATCGCGAGAGCATCCTGA
TCATGTGTGCAAGCTGAAAAGGCCTTGTACGGATTAACAACAGCTCCACAAGCTTGGTATGAAAAGGTTGCG
TCAATTCCTTCAATTTTGTGGCTATGAGGCATCAAATTCGACCCGAGTCTATTCTTCAAGAAGAAGGAGGA
GTCCACGTAGTAGTTCTTCTTTACGTGGATGATGATAATTACCGGGAATGATGATGCAGAAATTGCTCGCT
TACAAGAAGACATGTCGATAAGGTTGAGATGAAGAAGTTGGGTGAGCTGAATAACTTCTTGGCCTAGAGG
TTGAAAGAAGAAAGGATGGAATATTCGTTGGTCAACAAGGTTATGCAAGAAGGATTGTTGAGAAATTCAGGGT
GCACGAAGGAAAGACGCGCACTACTCCGATGGATGTGACCATCAAGCTCAAACGTGATGAAGGTTCAATGTT
ACCTGATCCTCGACCTTATCGCGCTCTTGTGGGAAGTCTTCTATACTTAACCATTACAAGACCTGATATTGCC
TTCGCAAGTGTGTTGTAAGTCGGTTTATGCAAGCACAAGGAAACCACTTAGAAGCGGCAAGAAGATC
TTGAAGTATGTCAAGACAACCTTTGACATGGGCTTGGTGTACAAGTACAATGCAAAGATTTCTCTTATTGGTTT
TACGGATGCTGACTTTGGTGGAGATCTAGATGACCGAAAATCAACTTCGGCAATGTGTTCTTATGTGGAGA
CACAAGCATTTGCTGGTGTAGCAAGAACAACCAACGGTATCGCTATCTACCACTGAAGCGGAGTATAAAGC
TTCCACACTCGCTGCTCAAGAGTGTAATGGCTTCGAAGACTCTTGAAGATTTGTTTCGAGCCTATAAATAAA
CCGGTGGCTATCTACGGAGATAATCAAAGTGCTATCAAGTTAGCTAACAATCCGGTGTTCATGCAAGGACAA
AGCATATTGAGTTAGAACATCACTTCATAAGGGGAGAAGGTTCTTGATGGAACAATTGAAGCCTTAGAAGTTCCG
AAGTAGGACACACGTTGCGGACATCTTCAACCAAGTACTTCAAAAAGGCCAATTCGAGTTACTTCGCTCGAA
GCTCGGGATGGTTGACAAAATCAAGTTTAAAGGGGAGTATTGAAGTTAAACTTGATTTTGGTTAAGCTTAAT
TATGGGTTTATAATTCAATATTCTATATTGGACAAAACCCAAAAGTTAAGCCTAAGTTCTAGATTTCTCTAGAGC
ATCATAGAAAAATCATCACCTCCTTAAATGTTGAACAAGTGAATAAAAAGAAAGTTCAAATAAAAATTAAGAAC
ACTCTTAAAAGTTCTCTAAGTCTCTCCAAAAGTCTTCAAGTAATCTCTAATTGTTCTTCCAAAATTTCTATCAT
ACTTAGA

```

**Figure S10.** Heat responsive elements (HREs) found in 5' long terminal repeats of *TERESTRA* elements. All identified *TERESTRA* elements (irrespective of their heat-responsiveness) are shown. HRE types: red – 4P, yellow – gap, green – step.

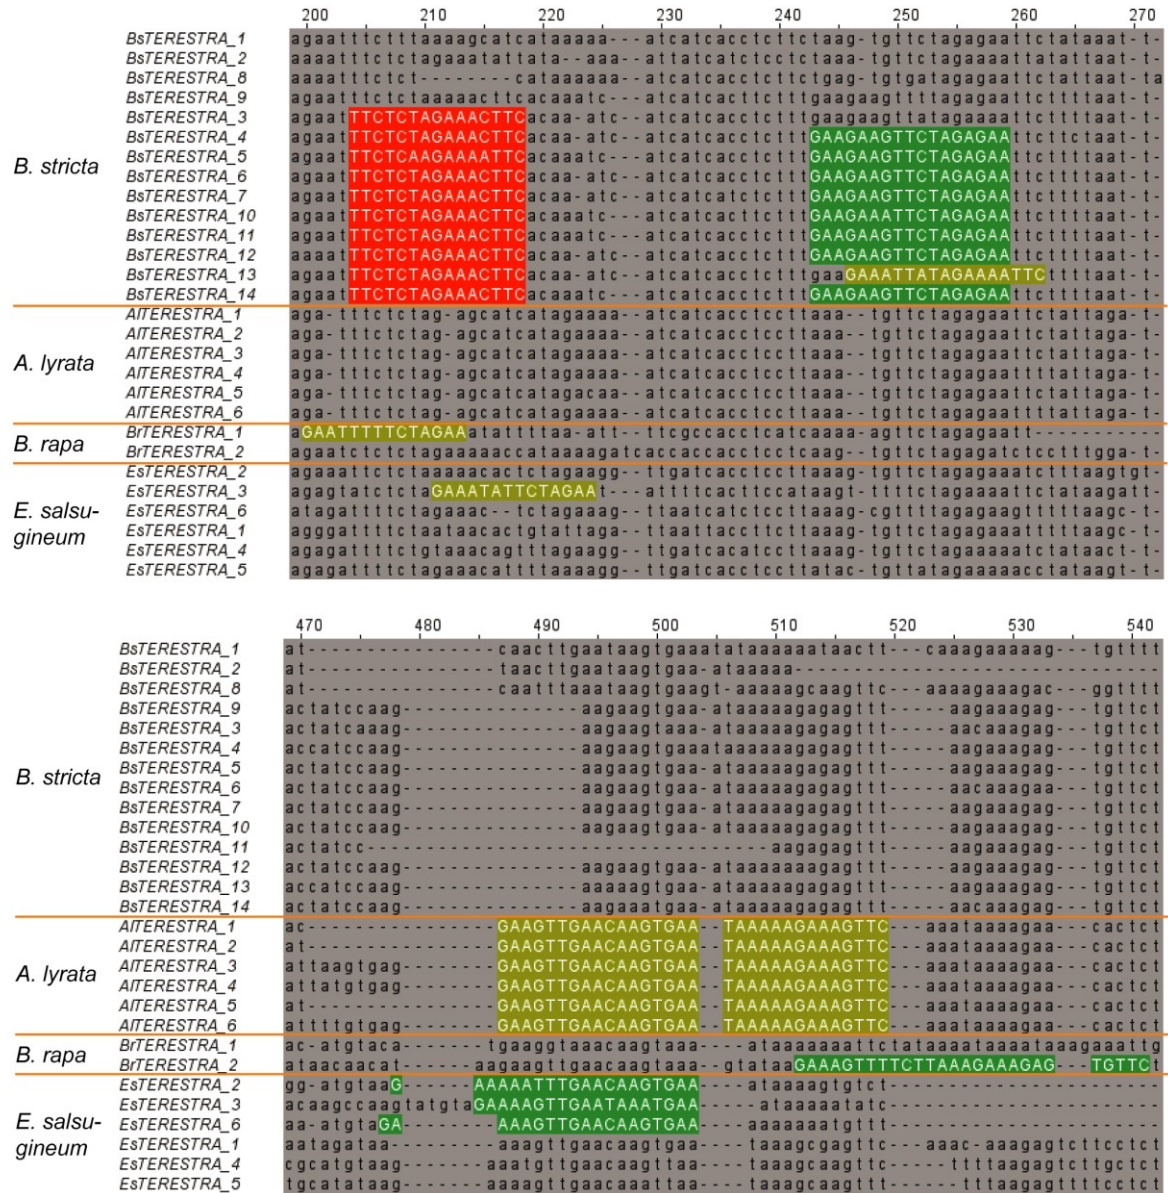



**Figure S11.** Transcriptional response of *ONSEN*, *COPIA37* and *TERESTRA* to DNA methylation inhibitor treatments in *A. lyrata*. Relative transcript accumulation after 48 h control, 10  $\mu$ M 3-deazaneplanocin A (DZNep) and 40  $\mu$ M zebularine treatment. Transcript amounts were normalized to *UBC28*. Error bars indicate variation between two biological replicates and \* shows statistically significant differences at  $\alpha = 0.05$  in Student's T-test.

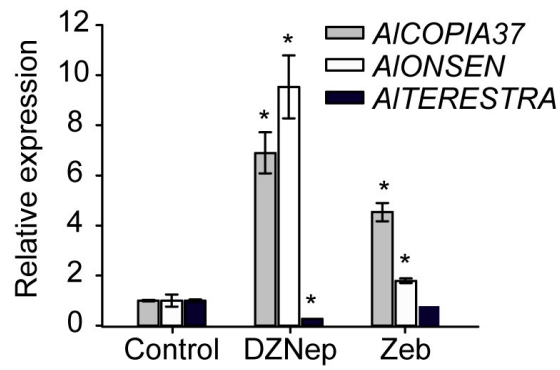

**Figure S12.** Density of RNA-sequencing reads mapping over *APUM9* – *ROMANIAT5-2* region.

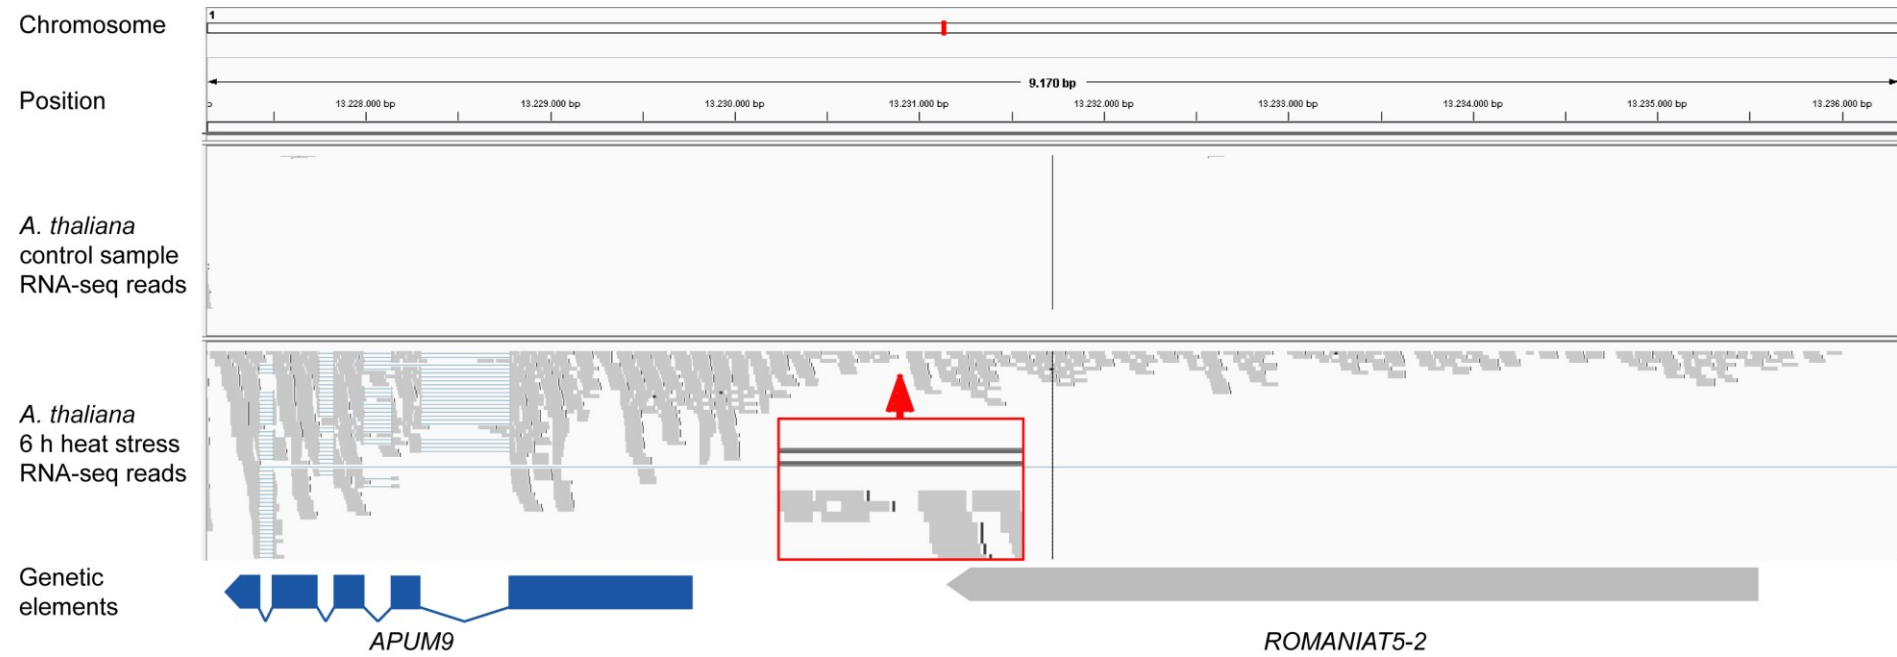

**Figure S13.** Putative heat responsive elements (HREs) in 5'/3' long terminal repeats of *ROMANIAT5* elements. HRE types: orange – 3P, yellow – gap, green – step.

|                       |                       | 320               | 330                     | 340                 | 350                 | 360 | 370 |
|-----------------------|-----------------------|-------------------|-------------------------|---------------------|---------------------|-----|-----|
|                       | <i>BsRomaniaT5_5</i>  | cgtattcaataatgac  | TTCACCATTCTTCTCGAGTTC   | ttgagtgtaagag-aaaaa |                     |     |     |
| <i>B. stricta</i>     | <i>BsRomaniaT5_4</i>  | tgtattcaacactgat  | TTCCTGATTTTTCTCGAGTTC   | ttgtgtgtaagag-aaaaa |                     |     |     |
|                       | <i>BsRomaniaT5_8</i>  | tgtattcaacactgat  | tttctgatttttctcgagcctt  | ttgtgtaaaagagaaaaa  |                     |     |     |
|                       | <i>BsRomaniaT5_9</i>  | tgtattcaacactaat  | tttctgatttttctcgagcctt  | ttgtgtaaaag-aaaaa   |                     |     |     |
| <i>C. rubella</i>     | <i>CrRomaniaT5_1</i>  | tgtattggatgtcaac  | TTCCTTCTTTTTCTCGAGTTC   | ttgagataaagaa-aaaaa |                     |     |     |
|                       | <i>CrRomaniaT5_4</i>  | tatactggatatacaac | TTCCTTGTTTTCTCGAGTTC    | tcgagtgtaggag-aaaaa |                     |     |     |
| <i>A. thaliana</i>    | <i>AtRomaniaT5_1</i>  | tgtattgcac        | TTCTACTTCCTTGTTTC       | ttctcgagcctt        | ttgagtgtaggag-aagaa |     |     |
|                       | <i>AtRomaniaT5_3</i>  | tgtattgcac        | TTCTACTTCCTTGTTTC       | ttctcgagttct        | ttgagtgtaggag-aagaa |     |     |
|                       | <i>AtRomaniaT5_4</i>  | tgtattgcac        | TTCTACTTCCTTGTTTC       | ttctcgagcctt        | ttgagtgtaggag-aagaa |     |     |
|                       | <i>AtRomaniaT5_2</i>  | tgtattgcaccctctac | TTCCTTGTTCTTCTCGAGTTC   | ttgagtgtaagag-aagaa |                     |     |     |
| <i>B. rapa</i>        | <i>BrRomaniaT5_1</i>  | aaatactcgaatgccac | ttctttatftttctcgagcctcc | ttatgtacgag-aaaaa   |                     |     |     |
|                       | <i>BrRomaniaT5_2</i>  | catactcaatgiccac  | ttctttatftttctcgagcctt  | ttatgtacgag-aaaaa   |                     |     |     |
|                       | <i>BrRomaniaT5_3</i>  | tatactcgaatgccac  | ttctttatftttctcgagcctc  | ttatgtacgag-aaaa-   |                     |     |     |
|                       | <i>BrRomaniaT5_6</i>  | catactcgaatgccac  | ttctttatftttctcgagcctc  | tcgtagtag-aaaaa     |                     |     |     |
|                       | <i>BrRomaniaT5_7</i>  | catactcaatgiccac  | ttctttatftttctcgagcctcc | ggagtag-aaaaa       |                     |     |     |
|                       | <i>BrRomaniaT5_8</i>  | catactcgaatgccac  | TTCTTTATTTTTCTCGAGTTC   | ccgtagtag-aaaaa     |                     |     |     |
| <i>E. salsugineum</i> | <i>EsRomaniaT5_7</i>  | catactggatatacgac | ttcttgatttttctcgagcctt  | ttgggtgtaagag-aaaaa |                     |     |     |
|                       | <i>EsRomaniaT5_9</i>  | catactggatatacgac | ttcttgatttttctcgagcctt  | ttgagataaagag-aaaaa |                     |     |     |
|                       | <i>EsRomaniaT5_36</i> | catactggata       | TTCACTTCCTGATTC         | ttctcgagttct        | ttgagtgtaagag-aaaaa |     |     |
|                       | <i>EsRomaniaT5_20</i> | catactggata       | TTCACTTCTCAATTATTC      | tcgatttct           | ttgagtgtaagaa-aaaaa |     |     |
|                       | <i>EsRomaniaT5_12</i> | catactggatataccac | TTCTTGATTTTTCTAGAGTTC   | ttgagtgtaagag-aaaaa |                     |     |     |
|                       | <i>EsRomaniaT5_60</i> | catactgataataccac | TTCCTGATTTTTCTCGAGTTC   | ttgagataaagag-aaaaa |                     |     |     |

**Table S4.** Primers used in this study.

| <i>At - Arabidopsis thaliana</i> |                                       |               |                               |             |
|----------------------------------|---------------------------------------|---------------|-------------------------------|-------------|
| <i>Al - Arabidopsis lyrata</i>   |                                       |               |                               |             |
| <i>Ba - Ballantinia antipoda</i> |                                       |               |                               |             |
| <i>Bs - Boechera stricta</i>     |                                       |               |                               |             |
| <i>Br - Brassica rapa</i>        |                                       |               |                               |             |
| <i>Cr - Capsella rubella</i>     |                                       |               |                               |             |
| <i>Es - Eutrema salsugineum</i>  |                                       |               |                               |             |
| Target                           | Species                               | Primer name   | Sequence (5' to 3')           | Application |
| <i>COPIA20</i>                   | <i>At, Al</i>                         | C20_qF2       | TACATGAAGCCACCACCGGGT         | RT-qPCR     |
|                                  | <i>At, Al</i>                         | C20_qR3       | TCATCTCCGGGAATGACAAGGTA       | RT-qPCR     |
| <i>COPIA37</i>                   | <i>At</i>                             | AtC37_F2      | AGCTTAACTACAGAAGGGAAGGA       | RT-qPCR     |
|                                  | <i>At</i>                             | AtC37_R2      | CTCTCCAATCTCTCATTTTCTCG       | RT-qPCR     |
|                                  | <i>Cr</i>                             | CrC37_F1      | GGAGGTAGGTGAGACAAGACA         | RT-qPCR     |
|                                  | <i>Cr</i>                             | C37_LTRR1     | AACCGCTACGTCTCGGGG            | RT-qPCR     |
|                                  | <i>Al</i>                             | AlyC37qF3     | AACGCAGCCGAAGCTAATC           | RT-qPCR     |
|                                  | <i>Al</i>                             | AlyC37qR3     | CTCCATCACCGGCTAACAAC          | RT-qPCR     |
|                                  | <i>Br</i>                             | EsC37-u_F1    | ACAGGTGGGyCTTTAATGGGC         | RT-qPCR     |
|                                  | <i>Br, Es</i>                         | C37_u_LTRR1   | AACCGSTACGTCTCGGGG            | RT-qPCR     |
|                                  | <i>Es</i>                             | EsC37_F1      | ACAGGTGGGTCTTTAATGGGC         | RT-qPCR     |
| <i>COPIA78</i>                   | <i>At, Bs</i>                         | AtCOPIA78qF2  | CGGTGCTCACAAAGAGCAACTATG      | RT-qPCR     |
|                                  | <i>At, Bs</i>                         | AtCOPIA78qR3  | ATCCTTGATAGATTAGACAGAGAGCT    | RT-qPCR     |
|                                  | <i>Al</i>                             | AlCOPIA78qF3  | ACAATGCTCACAAAGAGCAACTATG     | RT-qPCR     |
|                                  | <i>Al</i>                             | COPIA78qR3    | ATCCTTGATAGATTAGACAGAGAGCT    | RT-qPCR     |
|                                  | <i>Ba</i>                             | Ba_ONS_F1     | ACATGTACCGGATGAGAAGCG         | RT-qPCR     |
|                                  | <i>Ba</i>                             | Ba_ONS_R1     | TGTGTCCGGTTGTAGAGCT           | RT-qPCR     |
|                                  | <i>Br</i>                             | Br_ONS_F1     | TTGCGTGCATGATGTCAGGT          | RT-qPCR     |
|                                  | <i>Br</i>                             | Br_ONS_R1     | ACGCCAATGGAATGTCGAGT          | RT-qPCR     |
|                                  | <i>Es</i>                             | EsONS_F5      | GTCTTGGCTTTGGCATCTTC          | RT-qPCR     |
|                                  | <i>Es</i>                             | EsONS_R5      | GCGCTCTTGTCTGACTCC            | RT-qPCR     |
| <i>GAPC-2</i>                    | <i>At, Al, Ba, Bs, Br, Cr, Es, Aa</i> | GAPC-2_F      | ATCGGTCGTTTGGTTGCTAGAGT       | RT-qPCR     |
|                                  | <i>At, Al, Ba, Bs, Br, Cr, Es, Aa</i> | GAPC-2_R      | ACAAAGTCAGCTCCAGCCTCA         | RT-qPCR     |
| <i>GFP-4</i>                     | <i>At</i>                             | GFP4-F        | GGCAGACTTCTTCAAGAGC           | RT-qPCR     |
|                                  | <i>At</i>                             | GFP4-R        | AAAGGCCAGATTGTGTGGAC          | RT-qPCR     |
| <i>TERESTRA</i>                  | <i>Bs, Br, Es</i>                     | TERESTRA_F1   | TCATGTATGGAGTCATACTTGGT       | RT-qPCR     |
|                                  | <i>Bs, Br, Es</i>                     | TERESTRA_u_R1 | CACCTTGAGACATGCTCAAATA        | RT-qPCR     |
|                                  | <i>At, Al</i>                         | TERESTRAF2    | GTATTACGGTCTTGGGCTAGTG        | RT-qPCR     |
|                                  | <i>At, Al</i>                         | TERESTRA_R2   | ACCAAGTATGACTCCATACATGAC      | RT-qPCR     |
| <i>HSP101</i>                    | <i>At</i>                             | HSP101qF      | TGAGCTAGCTGTGAATGCAGGACATGCTC | RT-qPCR     |

|                  |                                       |               |                               |                |
|------------------|---------------------------------------|---------------|-------------------------------|----------------|
|                  | <i>At</i>                             | HSP101qR      | ATCACTCTTTCAGCAGATTGAGCTGCGTT | RT-qPCR        |
| <i>ROMANIAT5</i> | <i>At, Al, Br, Bs, Cr, Es</i>         | RT5_gener_F2  | CGTGGAGGGATATGCTTCGTT         | RT-qPCR        |
|                  | <i>At, Al, Br, Bs, Cr, Es</i>         | RT5_gener_R2  | TGCAATCTCGTGGCGTTCT           | RT-qPCR        |
|                  | <i>At</i>                             | ROMANIAT5-2qF | TTGTCACTTGAACGAATGTATTGCACC   | RT-qPCR        |
|                  | <i>At</i>                             | ROMANIAT5-2qR | GCCAACAAGAATATATGAAGATAATGC   | RT-qPCR        |
|                  | <i>At</i>                             | ROM_sense     | TTCCAATGCTTTGAACATGA          | cDNA synthesis |
|                  | <i>At</i>                             | ROM_antiS     | TGAATACATCACGAGAAAAGA         | cDNA synthesis |
| <i>PUM9</i>      | <i>At</i>                             | PUM9qF        | CATGGTCCCATTCAGATCTTTGACA     | RT-qPCR        |
|                  | <i>At</i>                             | PUM9qR        | TTTAGTCAACAAGTCCACGAGCTCA     | RT-qPCR        |
|                  | <i>At</i>                             | PUM9_sense    | TCACGTGGCTACTAAACTTCT         | cDNA synthesis |
|                  | <i>At</i>                             | PUM9_antiS    | AGCTTAACTTCCGAGGAG            | cDNA synthesis |
| <i>UBC28</i>     | <i>At, Al, Ba, Bs, Br, Cr, Es, Aa</i> | UBC28qF       | TCCAGAAGGATCCTCCAACCTCCTGCAGT | RT-qPCR        |
|                  | <i>At, Al, Ba, Bs, Br, Cr, Es, Aa</i> | UBC28qR       | ATGGTTACGAGAAAGACACCGCCTGAATA | RT-qPCR        |
| <i>18S</i>       | <i>At</i>                             | 18S-1062-F    | TTATAGGACTCCGCTGGCAC          | RT-qPCR        |
|                  | <i>At</i>                             | 18S-1345-R    | CAGGCTGAGGTCTCGTTCAT          | RT-qPCR        |
